# Supplementary material for: QNB: differential RNA methylation analysis for count-based small-sample sequencing data with a quad-negative binomial model
Source: PubMed Central journal article supplement (PMC5667504; doi:10.1186/s12859-017-1808-4), 2017-08-31
Supplement: 12859_2017_1808_MOESM1_ESM.pdf [file 12859_2017_1808_MOESM1_ESM.pdf]

**Proof:**  $(\hat{w}_{t,i,\rho} - z_{t,i,\rho})$  is an unbiased estimator for  $v_{t,i,\rho}$

The following derivation was inspired by the DESeq model [1]. Following the notation in the main text,

let  $q_{t,i,j} = \frac{t_{i,j}}{\hat{s}_{t,j}\hat{e}_{i,\rho(j)}}$ , then we have,

$$\begin{aligned} (|\rho|-1)\hat{w}_{t,i,\rho} &= \sum_{j:\rho(j)=\rho} [q_{t,i,j} - \bar{q}_{t,i,\rho}]^2 \\ &= \sum_{j:\rho(j)=\rho} \left[ (q_{t,i,j})^2 - \left[ \frac{2}{|\rho|} q_{t,i,j}^2 + \frac{2}{|\rho|} q_{t,i,j} \sum_{k \neq j}^{|\rho|} (q_{t,i,k}) \right] \right] \\ &+ \sum_{j:\rho(j)=\rho} \left[ \frac{1}{|\rho|^2} \left[ \sum_{j=1}^{|\rho|} (q_{t,i,j}^2) + \frac{1}{|\rho|} \sum_{k \neq j}^{|\rho|} (q_{t,i,k} q_{t,i,j}) \right] \right] \end{aligned} \quad (1)$$

For the expectation, we have

$$\mathbb{E}[(|\rho|-1)\hat{w}_{t,i,\rho}] = \left(1 - \frac{1}{|\rho|}\right) \sum_{j:\rho(j)=\rho} \text{var}(q_{t,i,j}) \quad (2)$$

Since the variance of  $t_{i,j}$  is  $\hat{w}_{t,i,\rho} = \frac{1}{(|\rho|-1)} \sum_{j:\rho(j)=\rho} \left[ \frac{t_{i,j}}{\hat{s}_{t,j}\hat{e}_{i,\rho(j)}} - \bar{q}_{t,i,\rho} \right]^2$ . Then, the variance of  $q_{t,i,j}$  is

$$\text{var}(q_{t,i,j}) = \frac{\mu_{t,i,j} + (e_{i,\rho(j)} s_{t,j})^2 v_{t,i,\rho(j)}}{(\hat{e}_{i,\rho(j)} \hat{s}_{t,j})^2} = \frac{\hat{q}_i \hat{p}_{i,\rho(j)}}{\hat{e}_{i,\rho(j)} \hat{s}_{t,j}} + v_{i,\rho(j)} \quad (3)$$

We defined previously  $z_{t,i,\rho} = \frac{\hat{q}_i \hat{p}_{i,\rho(j)}}{|\rho|} \sum_{j:\rho(j)=\rho} \left( \frac{1}{\hat{s}_{t,j} \hat{e}_{i,\rho(j)}} \right)$ . After combining (2) and (3), we have,

$$\mathbb{E}[\hat{w}_{t,i,\rho} - z_{t,i,\rho} - v_{t,i,\rho}] = \mathbb{E} \left[ \frac{\hat{q}_i \hat{p}_{i,\rho(j)}}{\hat{e}_{i,\rho(j)} \hat{s}_{t,j}} - \frac{\hat{q}_i \hat{p}_{i,\rho(j)}}{|\rho|} \sum_{j:\rho(j)=\rho} \left( \frac{1}{\hat{s}_{t,j} \hat{e}_{i,\rho(j)}} \right) \right] = 0 \quad (4)$$

So,  $(\hat{w}_{t,i,\rho} - z_{t,i,\rho})$  is an unbiased estimator for  $v_{t,i,\rho}$ .

## Reference

1. Anders S, Huber W: Differential expression analysis for sequence count data. *Genome Biol* 2010, 11(10):R106.
